# Supplementary material for: Three Zn(ii) coordination polymers constructed with a new amide-thiophene-derived bis-pyridyl ligand as ultrasensitive luminescent sensors for Hg(ii) and purines
Source: Royal Society of Chemistry journal article supplement (doi:10.1039/d1ce00527h), 2021-01-01
Supplement: d1ce00527h1.pdf [file d1ce00527h1.pdf]

Electronic Supplementary Information (ESI) For

## Three Zn(II) Coordination Polymers Constructed with a New Amide-thiophene-derived Bis-pyridyl Ligand as Ultrasensitive Luminescent Sensors for Hg(II) and Purines

Xiuli Wang<sup>\*a</sup>, Jianxin Ma<sup>a,b</sup>, Na Xu<sup>a</sup>, Yue Wang<sup>a</sup>, Jiayu Sun<sup>a</sup>, and Guocheng Liu<sup>a</sup>

<sup>a</sup> College of Chemistry and Materials Engineering, Bohai University, Professional Technology Innovation Center of Liaoning Province for Conversion Materials of Solar Cell, Jinzhou 121013, P. R. China

<sup>b</sup> School of Materials science and Engineering, Changchun University of Science and Technology, Changchun 130022, P. R. China

### S1. X-ray Crystallography

The single-crystal diffraction data for LCPs **1-3** were collected by using a Bruker SMART APEXII CCD diffractometer at 293 K with Mo  $K\alpha$  radiation ( $\lambda = 0.71073 \text{ \AA}$ ). The structures were solved by direct methods and refined by full matrix least-squares on  $F^2$  employing the OLEX2 program.<sup>1</sup> All crystal data and detailed structural refinement results are summarized in Table S1, and selected bond lengths ( $\text{\AA}$ ) and angles ( $^\circ$ ) are listed in Table S2. The single crystal data for LCPs **1-3** have been obtained in the Cambridge Crystallographic Data Center (CCDC no: 2060451, 2089164, and 2089165).

### Materials and methods

All chemicals and reagents were purchased from commercial sources and used as received except for 4-bpft (Scheme 1). The single-crystal diffraction data for LCPs **1-3** were collected by using a Bruker SMART APEXII CCD diffractometer at 293 K with Mo  $K\alpha$  radiation ( $\lambda = 0.71073 \text{ \AA}$ ). The powder X-ray diffraction (D/teX Ultra diffractometer) and the infrared spectra (Varian 640 FTIR spectrometer) were measured to confirm the structures of LCPs **1-3**. The fluorescent spectra were recorded on a Hitachi F-4500 luminescence/phosphorescence spectrometer. UV-vis absorption spectra were obtained by PerkinElmer Lambda 750. With a FLS1000 transient steady-state fluorescence spectrometer, the fluorescence lifetime could be obtained. The  $^1\text{H}$  NMR spectra was recorded on Agilent 400-MR spectrometer using DMSO- $d_6$  as a solvent.

**Table S1.** Crystallographic data for LCPs **1-3**.

| LCP                                                                      | LCP 1                                                                                         | LCP 2                                                             | LCP 3                                                             |
|--------------------------------------------------------------------------|-----------------------------------------------------------------------------------------------|-------------------------------------------------------------------|-------------------------------------------------------------------|
| CCDC                                                                     | 2060451                                                                                       | 2089164                                                           | 2089165                                                           |
| Empirical formula                                                        | C <sub>52</sub> H <sub>44</sub> Zn <sub>2</sub> N <sub>8</sub> O <sub>14</sub> S <sub>2</sub> | C <sub>27</sub> H <sub>22</sub> ZnN <sub>4</sub> O <sub>6</sub> S | C <sub>26</sub> H <sub>20</sub> ZnN <sub>4</sub> O <sub>7</sub> S |
| Formula weight                                                           | 1199.81                                                                                       | 595.91                                                            | 597.89                                                            |
| Crystal system                                                           | Triclinic                                                                                     | Triclinic                                                         | Triclinic                                                         |
| Space group                                                              | <i>P</i> $\bar{1}$                                                                            | <i>P</i> $\bar{1}$                                                | <i>P</i> $\bar{1}$                                                |
| <i>a</i> (Å)                                                             | 11.9101(5)                                                                                    | 10.0385(10)                                                       | 9.8851(8)                                                         |
| <i>b</i> (Å)                                                             | 14.8958(6)                                                                                    | 11.1557(12)                                                       | 10.8960(8)                                                        |
| <i>c</i> (Å)                                                             | 16.5644(7)                                                                                    | 12.4792(13)                                                       | 12.2041(10)                                                       |
| $\alpha$ (°)                                                             | 106.2430(10)                                                                                  | 79.339(2)                                                         | 82.082(2)                                                         |
| $\beta$ (°)                                                              | 109.7700(10)                                                                                  | 80.212(2)                                                         | 80.528(2)                                                         |
| $\gamma$ (°)                                                             | 96.0220(10)                                                                                   | 68.539(2)                                                         | 68.643(2)                                                         |
| <i>V</i> (Å <sup>3</sup> )                                               | 2589.55(19)                                                                                   | 1270.1(2)                                                         | 1203.18(17)                                                       |
| <i>Z</i>                                                                 | 2                                                                                             | 2                                                                 | 2                                                                 |
| <i>D</i> <sub>calc</sub> (g/cm <sup>3</sup> )                            | 1.539                                                                                         | 1.558                                                             | 1.650                                                             |
| $\mu$ /mm <sup>-1</sup>                                                  | 1.083                                                                                         | 1.101                                                             | 1.165                                                             |
| <i>F</i> (000)                                                           | 1232                                                                                          | 612                                                               | 612                                                               |
| <i>R</i> <sub>int</sub>                                                  | 0.0167                                                                                        | 0.0229                                                            | 0.0317                                                            |
| <i>R</i> <sub>1</sub> <sup>a</sup> [ <i>I</i> > 2 $\sigma$ ( <i>I</i> )] | 0.0419                                                                                        | 0.0409                                                            | 0.0406                                                            |
| <i>wR</i> <sub>2</sub> <sup>b</sup> (all data)                           | 0.1077                                                                                        | 0.1031                                                            | 0.0842                                                            |
| GOF                                                                      | 1.018                                                                                         | 1.021                                                             | 1.004                                                             |
| $\Delta \rho$ <sub>max</sub> (e <sup>-</sup> Å <sup>-3</sup> )           | 1.334 and -0.620                                                                              | 0.639 and -0.658                                                  | 0.356 and -0.395                                                  |

$$^a R_1 = \sum |F_o| - |F_c| / \sum |F_o|. \quad ^b wR_2 = [\sum w(F_o^2 - F_c^2)^2 / \sum w(F_o^2)^2]^{1/2}.$$

**Table S2.** Selected bond lengths (Å) and bond angles (°) for LCP **1**.

| LCP 1              |            |                    |            |
|--------------------|------------|--------------------|------------|
| Zn(2)–O(4)         | 2.0183(15) | Zn(1)–O(1)         | 1.9957(15) |
| Zn(2)–O(9)#1       | 2.1528(16) | Zn(1)–O(5)#2       | 2.0269(19) |
| Zn(2)–O(10)#1      | 2.2706(19) | Zn(1)–N(1)         | 2.163(2)   |
| Zn(2)–O(3)         | 2.0793(17) | Zn(1)–O(2)         | 2.0329(18) |
| Zn(2)–N(5)         | 2.144(2)   | Zn(1)–N(4)#2       | 2.166(2)   |
| Zn(2)–N(8)#1       | 2.177(2)   | O(2)–Zn(1)–N(4)#2  | 84.37(9)   |
| O(4)–Zn(2)–O(9)#1  | 153.75(7)  | N(5)–Zn(2)–O(9)#1  | 88.36(7)   |
| O(4)–Zn(2)–O(10)#1 | 94.55(7)   | N(5)–Zn(2)–O(10)#1 | 93.47(8)   |

|                      |           |                      |           |
|----------------------|-----------|----------------------|-----------|
| O(4)–Zn(2)–O(3)      | 115.78(7) | N(5)–Zn(2)–N(8)#1    | 174.54(7) |
| O(4)–Zn(2)–N(5)      | 93.34(7)  | N(8)#1–Zn(2)–O(10)#1 | 88.50(8)  |
| O(4)–Zn(2)–N(8)#1    | 91.59(8)  | O(1)–Zn(1)–O(5)#2    | 137.05(9) |
| O(9)#1–Zn(2)–O(10)#1 | 59.20(6)  | O(1)–Zn(1)–N(1)      | 93.90(7)  |
| O(9)#1–Zn(2)–N(8)#1  | 88.27(7)  | O(1)–Zn(1)–O(2)      | 121.98(8) |
| O(3)–Zn(2)–O(9)#1    | 90.41(7)  | O(1)–Zn(1)–N(4)#2    | 93.73(8)  |
| O(3)–Zn(2)–O(10)#1   | 149.33(6) | O(5)#2–Zn(1)–N(1)    | 88.82(8)  |
| O(3)–Zn(2)–N(5)      | 89.43(8)  | O(5)#2–Zn(1)–O(2)    | 100.97(9) |
| O(3)–Zn(2)–N(8)#1    | 86.30(8)  | O(5)#2–Zn(1)–N(4)#2  | 90.46(8)  |
| O(2)–Zn(1)–N(1)      | 85.52(9)  | N(1)–Zn(1)–N(4)#2    | 169.54(8) |

Symmetry codes: #1 -x,-y+2,-z+1, #2 -x+1,-y+1,-z+1

**Table S3.** Selected bond lengths (Å) and bond angles (°) for LCP 2.

| LCP 2              |            |                     |           |
|--------------------|------------|---------------------|-----------|
| Zn(1)–O(1)         | 2.0032(18) | Zn(1)–N(1)#3        | 2.191(3)  |
| Zn(1)–O(2)#1       | 2.060(2)   | Zn(1)–O(5)#2        | 2.348(2)  |
| Zn(1)–O(3)#2       | 2.19(2)    | Zn(1)–N(2)          | 2.177(3)  |
| N(2)–Zn(1)–N(1)#3  | 171.39(8)  | O(2)#1–Zn(1)–O(3)#2 | 91.2(6)   |
| O(1)–Zn(1)–O(2)#1  | 117.72(8)  | O(2)#1–Zn(1)–N(1)#3 | 83.52(9)  |
| O(1)–Zn(1)–O(3)#2  | 150.3(7)   | O(2)#1–Zn(1)–O(5)#2 | 150.35(8) |
| O(1)–Zn(1)–N(1)#3  | 91.41(8)   | O(2)#1–Zn(1)–N(2)   | 88.74(9)  |
| O(1)–Zn(1)–O(5)#2  | 90.34(8)   | O(3)#2–Zn(1)–O(5)#2 | 60.0(7)   |
| O(1)–Zn(1)–N(2)    | 95.53(9)   | N(1)#3–Zn(1)–O(3)#2 | 84.9(5)   |
| O(1)–Zn(1)–O(10)#2 | 146.3(7)   | N(1)#3–Zn(1)–O(5)#2 | 86.61(9)  |
| N(2)–Zn(1)–O(5)#2  | 98.41(9)   | N(2)–Zn(1)–O(3)#2   | 91.6(5)   |
| O(10)#2–Zn(1)–N(2) | 84.9(6)    |                     |           |

Symmetry codes: #1 -x+1, -y, -z+1, #2 x-1, y, z, #3 -x, -y, -z+1

**Table S4.** Selected bond lengths (Å) and bond angles (°) for LCP 3.

| LCP 3               |           |                   |           |
|---------------------|-----------|-------------------|-----------|
| Zn(1)–O(1)#1        | 1.983(2)  | Zn(1)–N(1)#2      | 2.196(3)  |
| Zn(1)–O(2)          | 1.979(2)  | Zn(1)–N(2)        | 2.179(3)  |
| Zn(1)–O(3)#2        | 2.034(2)  | O(2)–Zn(1)–N(1)#2 | 88.56(9)  |
| O(1)#1–Zn(1)–O(3)#2 | 129.41(9) | O(2)–Zn(1)–N(2)   | 91.57(10) |

|                     |           |                     |            |
|---------------------|-----------|---------------------|------------|
| O(1)#1–Zn(1)–N(1)#2 | 95.12(10) | O(3)#2–Zn(1)–N(1)#2 | 87.67(9)   |
| O(1)#1–Zn(1)–N(2)   | 90.78(10) | O(3)#2–Zn(1)–N(2)   | 84.86(9)   |
| O(2)–Zn(1)–O(1)#1   | 128.32(9) | N(2)–Zn(1)–N(1)#2   | 172.37(10) |
| O(2)–Zn(1)–O(3)#2   | 102.21(9) |                     |            |

Symmetry codes: #1 x+1, y, z, #2 -x+1, -y+2, -z

**Table S5.** Comparison of fluorescent property of LCPs 1–3 for sensing Hg(II).

| Fluorescent sensing materials | $K_{sv}$ ( $M^{-1}$ ) | Detection Limit (M)   | Medium                | Ref.      |
|-------------------------------|-----------------------|-----------------------|-----------------------|-----------|
| LCP 1                         | $5.44 \times 10^4$    | $9.83 \times 10^{-7}$ | H <sub>2</sub> O      | This work |
| LCP 2                         | $6.07 \times 10^3$    | $8.84 \times 10^{-6}$ | H <sub>2</sub> O      | This work |
| LCP 3                         | $2.43 \times 10^3$    | $2.21 \times 10^{-5}$ | H <sub>2</sub> O      | This work |
| CdTe QD                       | –                     | $1.0 \times 10^{-8}$  | H <sub>2</sub> O/MeCN | 2         |
| Au/N–CQDs                     | –                     | $1.18 \times 10^{-7}$ | H <sub>2</sub> O      | 3         |

**Table S6.** Comparison of fluorescent property of LCP 1 for sensing adenine.

| Fluorescent sensing materials | $K_{sv}$ ( $M^{-1}$ ) | Detection Limit (M)    | Medium           | Ref.      |
|-------------------------------|-----------------------|------------------------|------------------|-----------|
| LCP 1                         | $1.103 \times 10^4$   | $4.83 \times 10^{-6}$  | H <sub>2</sub> O | This work |
| L–Tryptophan–Cu <sup>2+</sup> | –                     | $0.046 \times 10^{-6}$ | H <sub>2</sub> O | 4         |
| GO–PANI                       | –                     | $1.3 \times 10^{-5}$   | H <sub>2</sub> O | 5         |
| N–GN                          | –                     | $8.0 \times 10^{-5}$   | DMA              | 6         |

**Table S7.** Comparison of fluorescent property of LCP 1 for sensing guanine.

| Fluorescent sensing materials | $K_{sv}$ ( $M^{-1}$ ) | Detection Limit (M)   | Medium           | Ref.      |
|-------------------------------|-----------------------|-----------------------|------------------|-----------|
| LCP 1                         | $8.99 \times 10^4$    | $5.97 \times 10^{-6}$ | H <sub>2</sub> O | This work |
| CDs                           | –                     | $0.67 \times 10^{-7}$ | H <sub>2</sub> O | 7         |
| CdTe nanoparticles            | –                     | $8 \times 10^{-8}$    | H <sub>2</sub> O | 8         |
| Cu <sup>2+</sup> -nuclear     | –                     | $1.9 \times 10^{-6}$  | H <sub>2</sub> O | 9         |
| GO–PANI                       | –                     | $1.36 \times 10^{-5}$ | H <sub>2</sub> O | 10        |

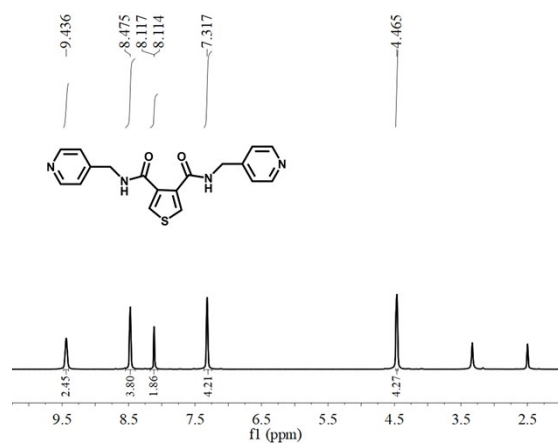

**Fig. S1.**  $^1\text{H}$  NMR spectrum of 4-bpft in  $\text{DMSO-}d_6$ .

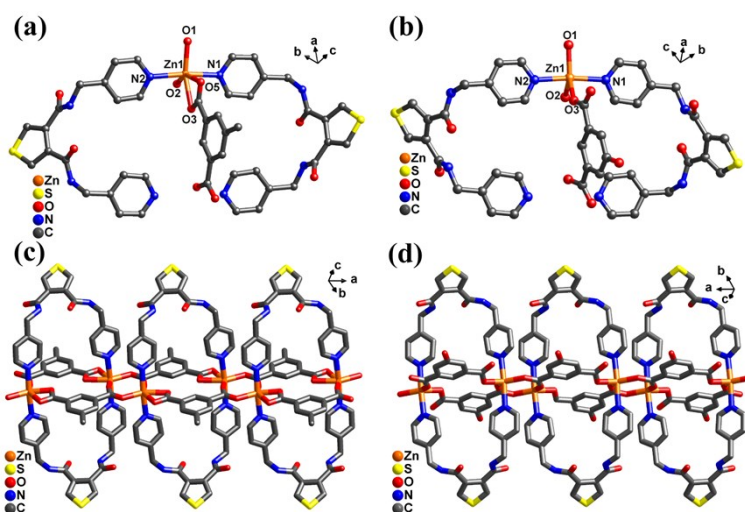

**Fig. S2.** The coordination environment of  $\text{Zn(II)}$  in LCP 2 (a) and LCP 3 (b). The 1D structure of LCP 2 (c) and LCP 3 (d).

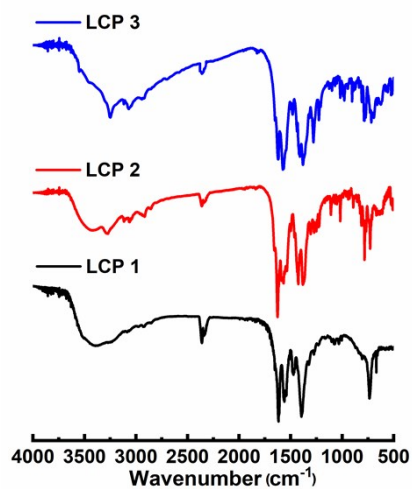

**Fig. S3.** The IR spectra of LCPs 1–3.

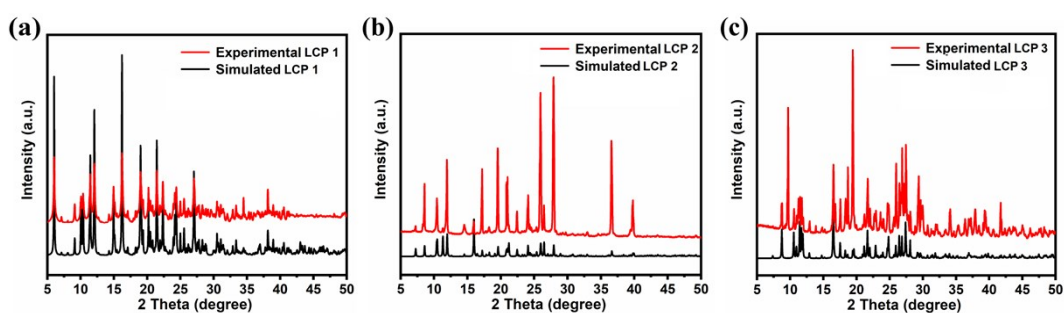

**Fig. S4.** The PXR D patterns of LCPs 1–3.

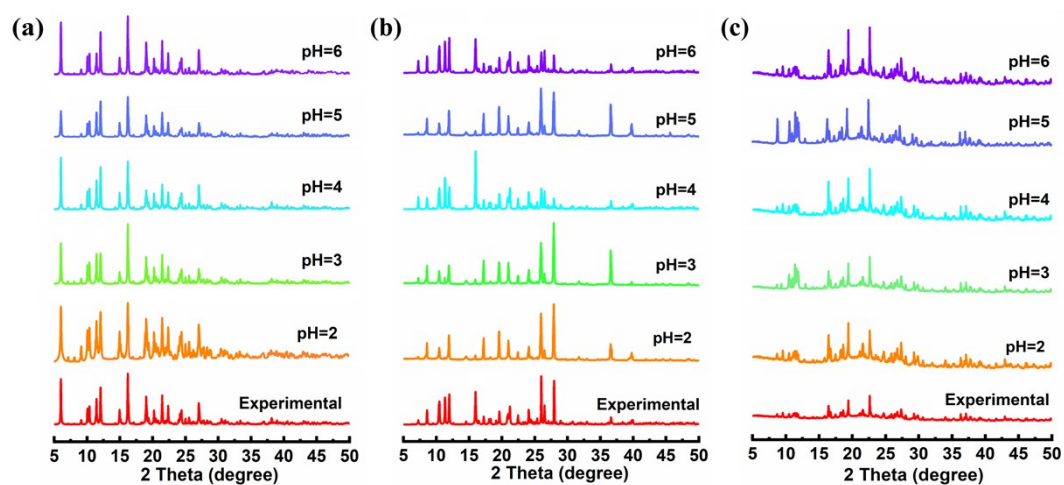

**Fig. S5.** The PXR D patterns of LCPs 1–3 before and after being soaked in acidic and basic solutions for 12 h with a wide pH range of 2.0 ~ 6.0.

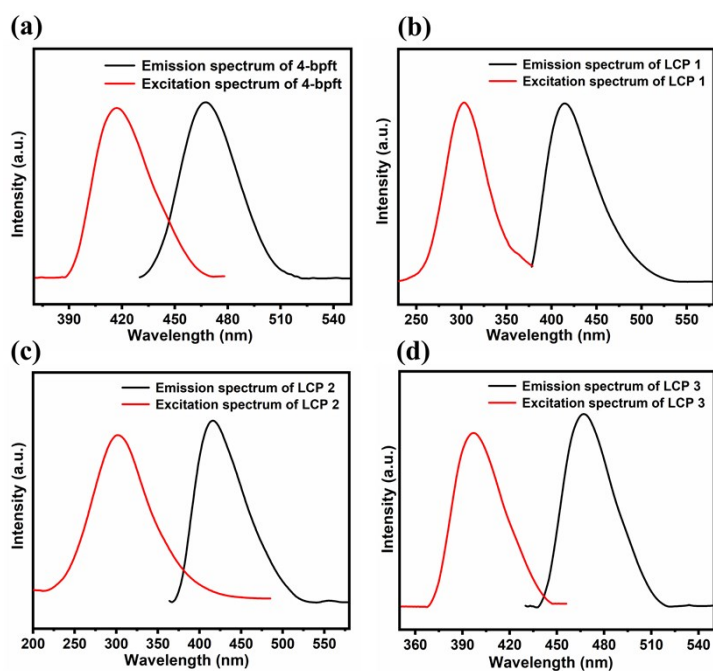

**Fig. S6.** The solid excitation and emission spectra of 4-bpft and LCPs 1–3.

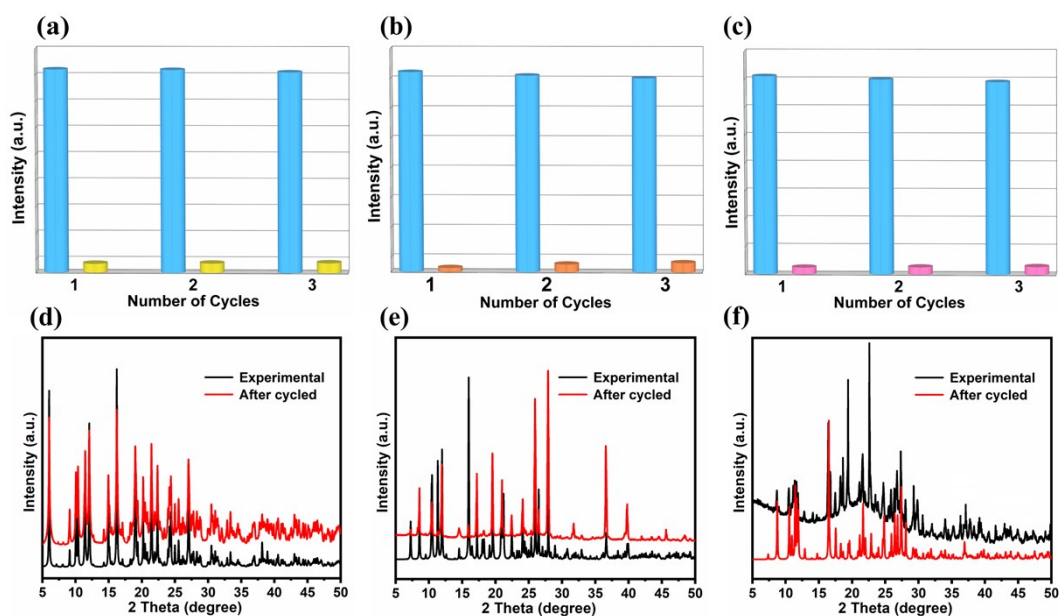

**Fig. S7.** The cyclic response of the luminescence intensities for detecting Hg(II) of LCP 1 (a), LCP 2 (b), and LCP 3 (c); The PXRD patterns treated by Hg(II) of LCP 1 (d), LCP 2 (e), and LCP 3 (f).

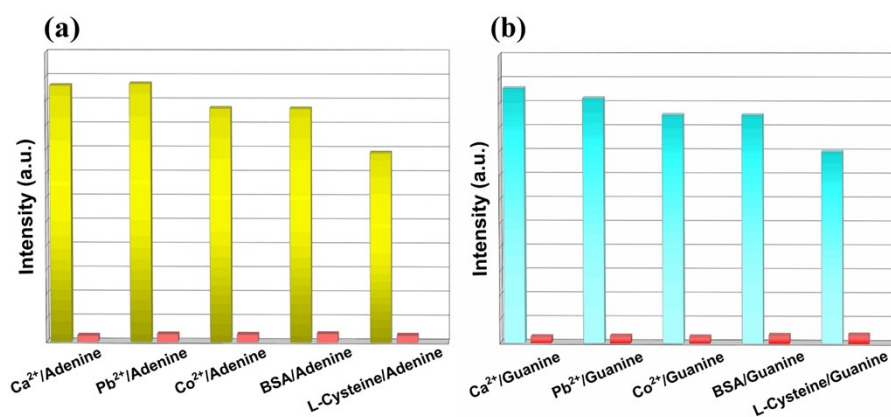

**Fig. S8.** Competitive quenching experiments of LCP 1 for the selective recognition of adenine (a) and guanine (b).

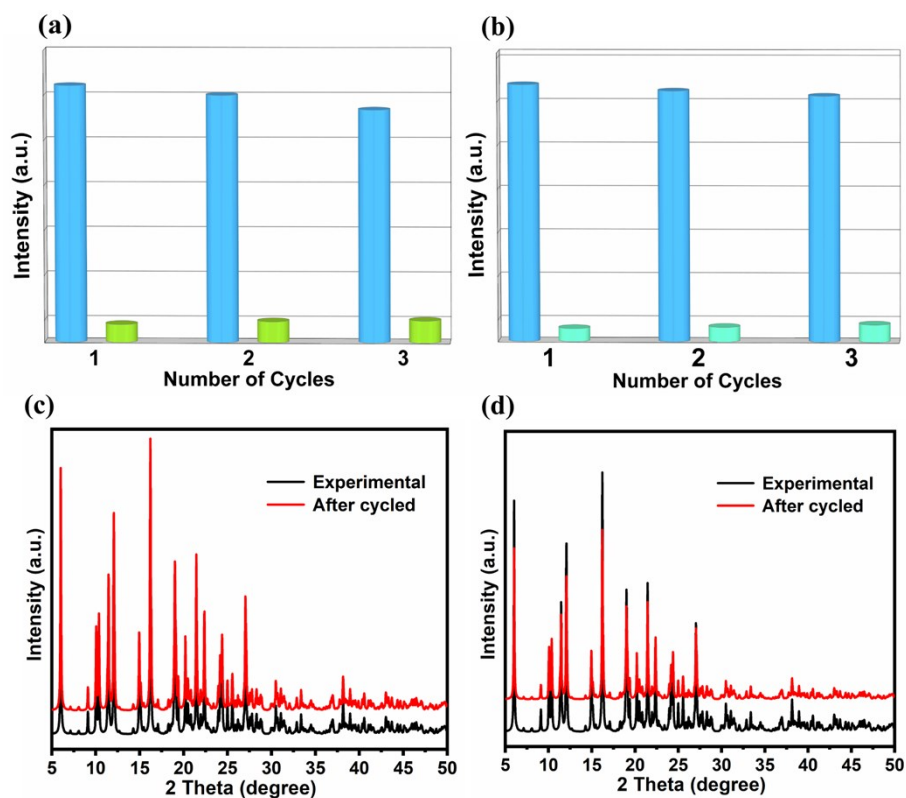

**Fig. S9.** The cyclic response of the luminescence intensities of LCP 1 for detecting of adenine (a) and guanine (b); The PXRD patterns of LCP 1 treated by adenine (c) and guanine (d).

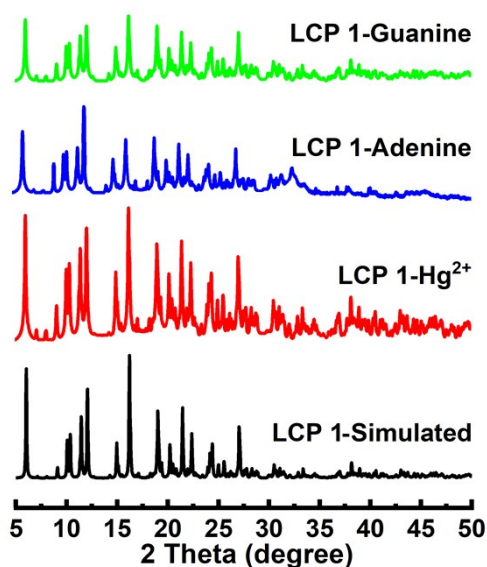

**Fig. S10.** The PXRD of LCP 1 after soaked in different analytes solution for 24h.



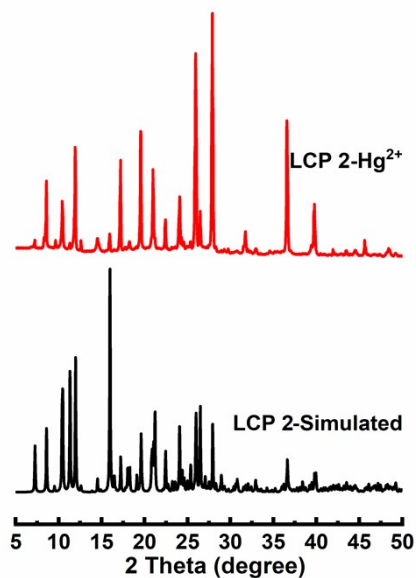

**Fig. S11.** The PXRD of LCP 2 after immersing in Hg(II) solution for 24h.

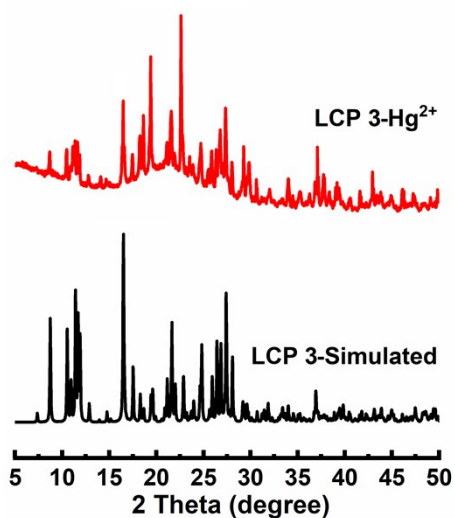

**Fig. S12.** The PXRD of LCP 3 after immersing in Hg(II) solution for 24h.

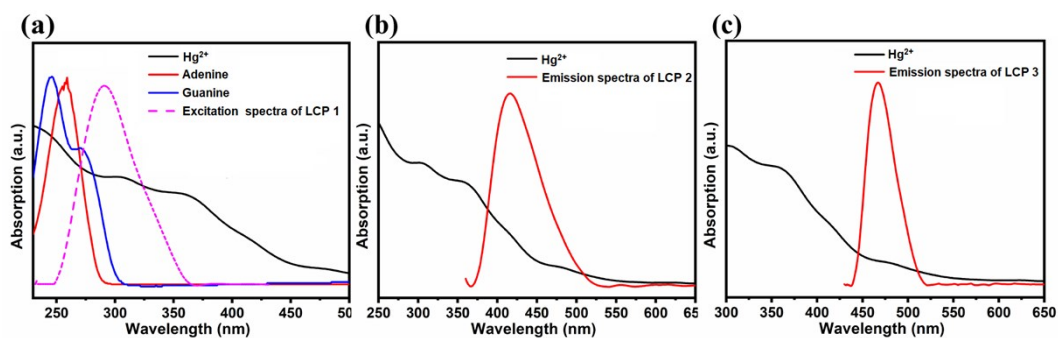

**Fig. S13.** UV-vis optical absorption spectra of analytes along with the excitation or emission spectra of LCPs 1–3.

## References

1. O. V. Dolomanov, L. J. Bourhis, R. J. Gildea, J. A. K., *J. Appl. Crystallogr.*, 2009, **42**, 339–341.
2. B. Chen, J. Ma, T. Yang, L. Chen, P. F. Gao, C. Z. Huang, *Biosens. Bioelectron.*, 2017, **98**, 36–40.
3. A. Meng, Q. Xu, K. Zhao, Z. Li, J. Liang, Q. Li, *Sens. Actuators B Chem.*, 2018, **255**, 657–665.
4. R. Duan, C. Li, S. Liu, *Spectrochimica Acta Part A: Molecular and Biomolecular Spectroscopy*, 2016, **152**, 272-277.
5. S. N. Tayade, A. K. Tawade, P. Talele, *Methods Appl. Fluoresc.*, 2019, **7**, 045002.
6. J. Li, J. Jiang, H. Feng, *RSC adv*, 2016, **6**, 31565-31573.
7. S. Pang, Y. Zhang, C. Wu, *Sens. Actuators B Chem.*, 2016, **222**, 857-863.
8. L. Li, Y. Lu, Y. Ding, *Can. J. Chem.*, 2012, **90**, 173-179.
9. Y. Cui, J. Yu, S. Feng, *Talanta*, 2014, **130**, 536-541.
10. S. N. Tayade, A. K. Tawade, P. Talele, *Methods Appl. Fluoresc.*, 2019, **7**, 045002.
